# Supplementary material for: Enhanced visible-light photocatalytic activity of g-C3N4/Zn2GeO4 heterojunctions with effective interfaces based on band match
Source: Royal Society of Chemistry journal article supplement (doi:10.1039/c3nr06104c), 2013-12-12
Supplement: c3nr06104c.pdf [file c3nr06104c.pdf]

## Supporting Information

### **Enhanced visible-light photocatalytic activity of g-C<sub>3</sub>N<sub>4</sub>/Zn<sub>2</sub>GeO<sub>4</sub> heterojunctions with effective interfaces based on band match**

Liming Sun, Yue Qi, Chun-Jiang Jia, Zhao Jin, and Weiliu Fan\*

*Key Laboratory for Colloid and Interface Chemistry of State Educating Ministry, School of Chemistry and Chemical Engineering, Shandong University, Jinan 250100, China*

\* To whom all correspondences should be addressed.

Tel: 86-531-88366330, Fax: 86-531-88364864,

E-mail: [fwl@sdu.edu.cn](mailto:fwl@sdu.edu.cn)

## S1. Structures of as-prepared g-C<sub>3</sub>N<sub>4</sub> and Zn<sub>2</sub>GeO<sub>4</sub>

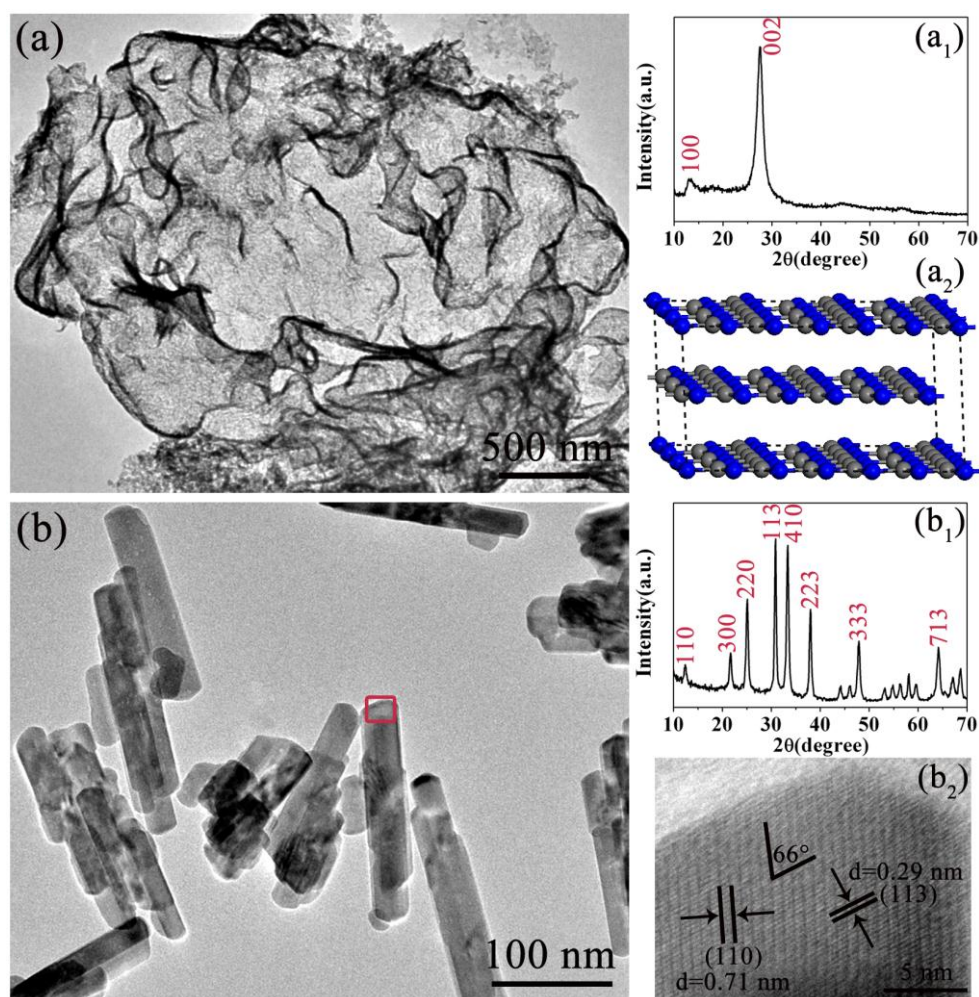

Fig. S1. TEM and XRD of as-prepared g-C<sub>3</sub>N<sub>4</sub> (a and a<sub>1</sub>) and Zn<sub>2</sub>GeO<sub>4</sub> (b and b<sub>1</sub>). (a<sub>2</sub>) and (b<sub>2</sub>) are the schematic of g-C<sub>3</sub>N<sub>4</sub> and the HRTEM of Zn<sub>2</sub>GeO<sub>4</sub> nanorods, respectively.

From the XRD spectra of g-C<sub>3</sub>N<sub>4</sub> (Fig. S1a<sub>1</sub>), it can be seen that there are two pronounced diffraction peaks at 13.1° and 27.4°, which can be indexed to the (100) and (002) diffraction planes of the graphite-like carbon nitride, respectively, and correspond to the characteristic inter-layer structural packing and the interplanar stacking peaks of the aromatic systems.<sup>1</sup> As shown in Fig. S1a and a<sub>2</sub>, g-C<sub>3</sub>N<sub>4</sub> has a crumpled layered structure with several stacking layers along *c*-axis, indicating that the as-prepared g-C<sub>3</sub>N<sub>4</sub> plates have exposed (001) surfaces. The XRD patterns of Zn<sub>2</sub>GeO<sub>4</sub> (Fig. S1b<sub>1</sub>) show that all the diffraction peaks can be assigned exactly to the rhombohedral phase of Zn<sub>2</sub>GeO<sub>4</sub> (JCPDS no. 11-0687). The as-prepared Zn<sub>2</sub>GeO<sub>4</sub> has

a rod-like shape (Fig. S1b). In the HRTEM of  $\text{Zn}_2\text{GeO}_4$  nanorods (Fig. S1b<sub>2</sub>), the lattice fringe of (110) with an interplanar spacing of 0.71 nm is observed parallel to the rod direction, and another lattice fringe of (113) with an interplanar spacing of 0.29 nm is observed at an angle of  $66^\circ$  to the rod direction. This indicates that the  $\text{Zn}_2\text{GeO}_4$  nanorods grow in the direction of the  $c$ -axis of the rhombohedral phenacite-type structure<sup>2</sup> and that the exposed side surfaces are (110) surfaces.

### S2. Photocatalytic activity of the acetic acid treated and calcined $\text{Zn}_2\text{GeO}_4$ and $\text{g-C}_3\text{N}_4$ :

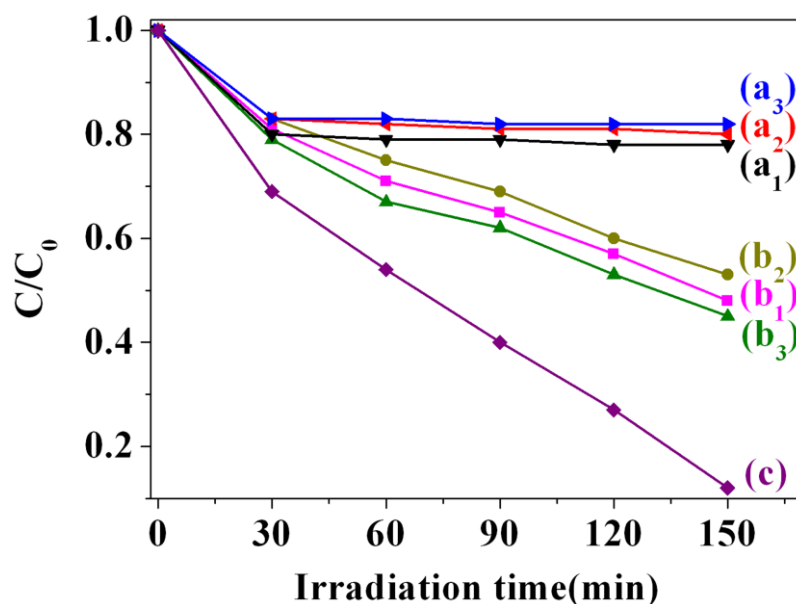

Fig. S2. Photocatalytic degradation of MB over the as-prepared pure  $\text{Zn}_2\text{GeO}_4$  (a<sub>1</sub>), acetic acid treated  $\text{Zn}_2\text{GeO}_4$  (a<sub>2</sub>), 250 °C calcined  $\text{Zn}_2\text{GeO}_4$  (a<sub>3</sub>), pure  $\text{g-C}_3\text{N}_4$  (b<sub>1</sub>), acetic acid treated  $\text{g-C}_3\text{N}_4$  (b<sub>2</sub>), 250 °C calcined  $\text{g-C}_3\text{N}_4$  (b<sub>3</sub>), and OSC 30 wt%  $\text{g-C}_3\text{N}_4/\text{Zn}_2\text{GeO}_4$  heterojunctions, respectively.

### S3. Stability of the OSC 30 wt% $\text{g-C}_3\text{N}_4/\text{Zn}_2\text{GeO}_4$ heterojunction photocatalysts:

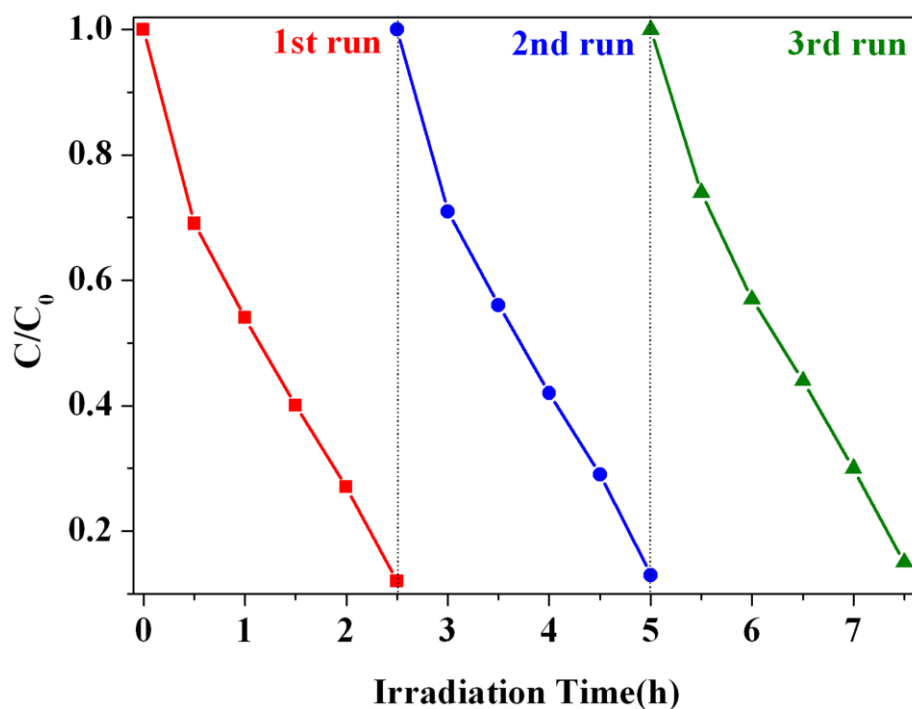

Fig. S3. Recycling test for the photocatalytic degradation of MB on OSC 30 wt% g-C<sub>3</sub>N<sub>4</sub>/Zn<sub>2</sub>GeO<sub>4</sub> heterojunctions under visible light irradiation.

#### S4. Photocurrents of the acetic acid treated and calcined Zn<sub>2</sub>GeO<sub>4</sub> and g-C<sub>3</sub>N<sub>4</sub>:

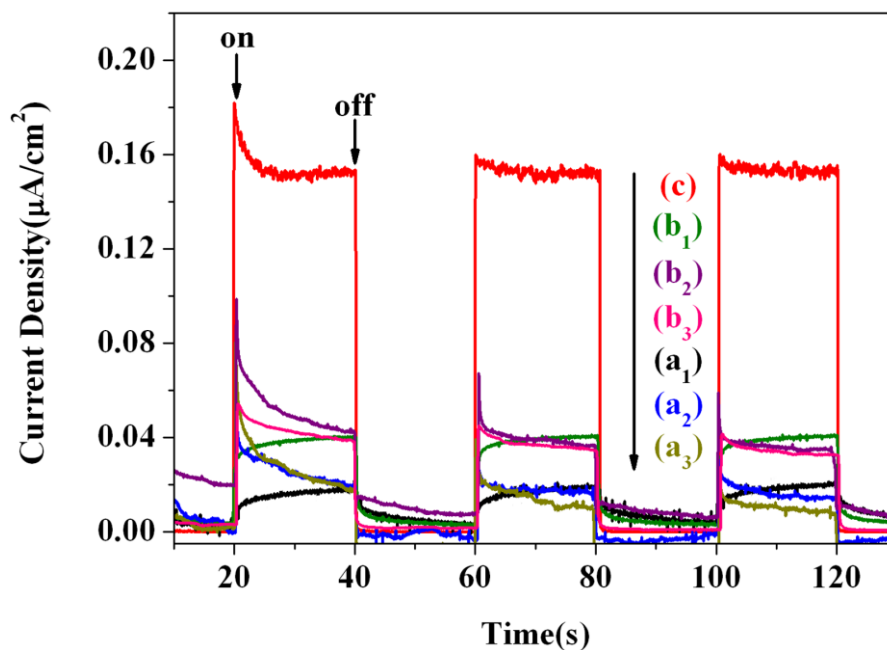

Fig. S4. Photocurrent response of as-prepared pure Zn<sub>2</sub>GeO<sub>4</sub> (a<sub>1</sub>), 250 °C calcined Zn<sub>2</sub>GeO<sub>4</sub> (a<sub>2</sub>), acetic acid treated Zn<sub>2</sub>GeO<sub>4</sub> (a<sub>3</sub>), pure g-C<sub>3</sub>N<sub>4</sub> (b<sub>1</sub>), 250 °C calcined g-C<sub>3</sub>N<sub>4</sub> (b<sub>2</sub>), acetic acid treated g-C<sub>3</sub>N<sub>4</sub> (b<sub>3</sub>), and OSC 30 wt% g-C<sub>3</sub>N<sub>4</sub>/Zn<sub>2</sub>GeO<sub>4</sub> heterojunctions (c) under visible-light irradiation ( $\lambda \geq 420$  nm) at 0.5 V vs Ag/AgCl.

**S5. TEM and HRTEM of g-C<sub>3</sub>N<sub>4</sub>/Zn<sub>2</sub>GeO<sub>4</sub> heterojunctions:**

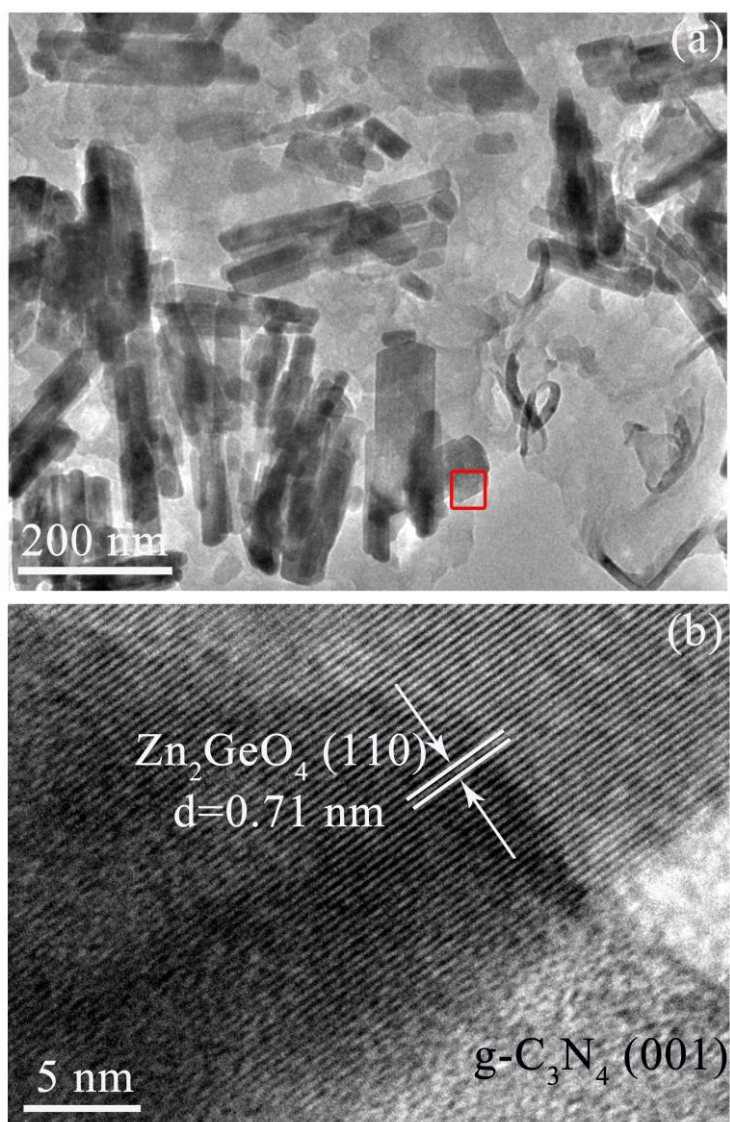

Fig. S5. TEM (a) and HRTEM (b) of the as-prepared g-C<sub>3</sub>N<sub>4</sub>/Zn<sub>2</sub>GeO<sub>4</sub> heterojunctions.

## S6. Work functions of g-C<sub>3</sub>N<sub>4</sub> (001) surfaces:

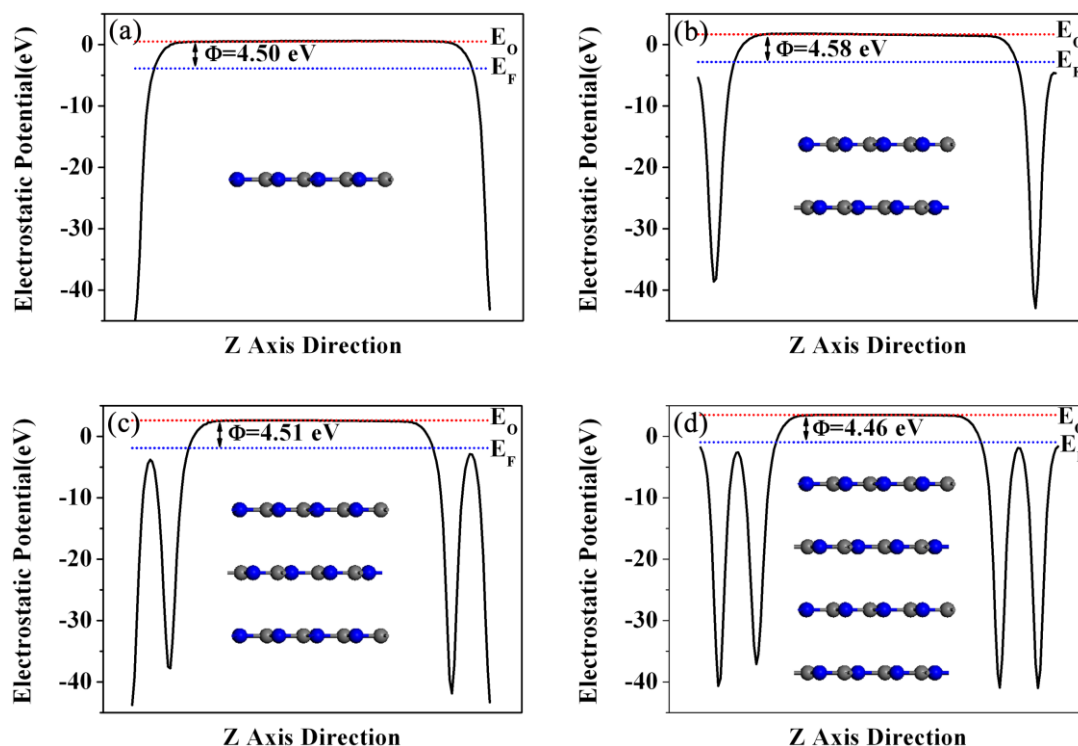

Fig. S6. The electrostatic potentials for g-C<sub>3</sub>N<sub>4</sub> (001) surface as a function of the number of C<sub>3</sub>N<sub>4</sub> layers: (a) one C<sub>3</sub>N<sub>4</sub> layer, (b) two C<sub>3</sub>N<sub>4</sub> layers, (c) three C<sub>3</sub>N<sub>4</sub> layers, and (d) four C<sub>3</sub>N<sub>4</sub> layers. The red and blue dashed lines represent the vacuum level E<sub>0</sub> and the Fermi Level E<sub>F</sub>, respectively.

## S7. UV-vis and VB XPS spectra of g-C<sub>3</sub>N<sub>4</sub> and Zn<sub>2</sub>GeO<sub>4</sub> individuals:

Fig. S7 shows the UV-vis and valence band X-ray photoelectron spectroscopy (VB XPS) spectra of pure g-C<sub>3</sub>N<sub>4</sub> and Zn<sub>2</sub>GeO<sub>4</sub>. The fundamental absorption edge of g-C<sub>3</sub>N<sub>4</sub> is at 474 nm, which can be assigned to a band gap of 2.62 eV (Fig. S7a). Pure Zn<sub>2</sub>GeO<sub>4</sub> exhibits an absorption edge of 288 nm corresponding to the band gap of 4.31 eV (Fig. S7c). The positions of the valence band (VB) edge of g-C<sub>3</sub>N<sub>4</sub> and Zn<sub>2</sub>GeO<sub>4</sub> can be seen at about 1.30 and 3.45 eV<sub>NHE</sub> (NHE=Normal Hydrogen Electrode) (Fig. S7b and d), respectively, which are consistent with the values reported in literature.<sup>3,4</sup> Because the relationship between E<sub>NHE</sub> and E<sub>AVS</sub> (AVS=Absolute Vacuum Scale) is E<sub>AVS</sub>=E<sub>NHE</sub>-E<sup>c</sup>, where E<sup>c</sup> is the energy of free electrons in the hydrogen scale (about 4.50 eV), the energies of the VB edge of g-C<sub>3</sub>N<sub>4</sub> and Zn<sub>2</sub>GeO<sub>4</sub> are estimated to be -5.80 and -7.95 eV<sub>AVS</sub>, respectively. Based



on the band gap positions, the energies of the CB edge of g-C<sub>3</sub>N<sub>4</sub> and Zn<sub>2</sub>GeO<sub>4</sub> are determined to be -3.18 and -3.64 eV<sub>AVS</sub>, respectively.

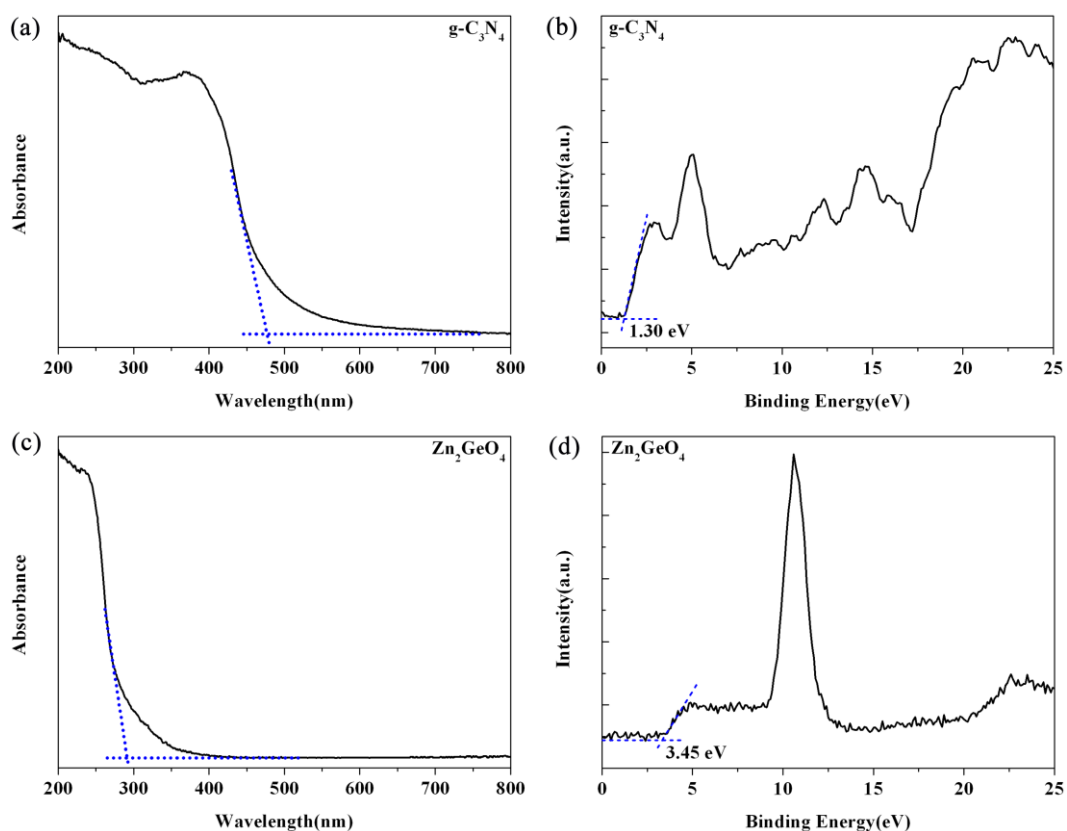

Fig. S7. UV-vis and VB XPS spectra for the pure g-C<sub>3</sub>N<sub>4</sub> (a and c) and Zn<sub>2</sub>GeO<sub>4</sub> (b and d), respectively.

## REFERENCES

- 1 S. Matsumoto, E. Q. Xie and F. Izumi, *Diamond Relat. Mater.*, 1999, **8**, 1175-1182.
- 2 S. C. Yan, L. J. Wan, Z. S. Li and Z. G. Zou, *Chem. Commun.*, 2011, **47**, 5632-5634.
- 3 F. Yang, M. Lublow, S. Orthmann, C. Merschjann, T. Tyborski, M. Rusu, S. Kubala, A. Thomas, R. Arrigo, M. Hävecker and T. Schedel-Niedrig, *ChemSusChem.*, 2012, **5**, 1227-1232.
- 4 N. Zhang, S. X. Ouyang, P. Li, Y. J. Zhang, G. C. Xi, T. Kako and J. H. Ye, *Chem. Commun.*, 2011, **47**, 2041-2043.
